# Supplementary material for: Cytochalasins as Modulators of Stem Cell Differentiation
Source: MDPI journal article supplement (doi:10.3390/cells13050400), 2024-02-25
Supplement: s1 [file s1]

**Table S1.** Cytochalasins and mesodermal differentiation.

|               | Reference Number | Title                                                                                                                                                             | Species and Cell Type | Molecular Treatment | Results* |
|---------------|------------------|-------------------------------------------------------------------------------------------------------------------------------------------------------------------|-----------------------|---------------------|----------|
| Odontogenesis | [76]             | Mechanical Changes in Human Dental Pulp Stem Cells during Early Odontogenic Differentiation                                                                       | hDPSCs                | CD (5 $\mu$ M)      | ↓        |
|               | [77]             | Static magnetic field regulates proliferation, migration, differentiation, and YAP/TAZ activation of human dental pulp stem cells                                 | hDPSCs                | CD (10 $\mu$ M)     | ↓        |
|               | [63]             | Topographic cues of a novel bilayered scaffold modulate dental pulp stem cells differentiation by regulating YAP signalling through cytoskeleton adjustments      | hDPSCs                | CD (1 $\mu$ g/mL)   | ↓        |
| Myogenesis    | [78]             | Linker of nucleoskeleton and cytoskeleton (LINC) complex-mediated actin-dependent nuclear positioning orients centrosomes in migrating myoblasts                  | mC2C12 myoblasts      | CD (0.5 $\mu$ M)    | ↓        |
|               | [79]             | Growth and cell density-dependent expression of stathmin in C2 myoblasts in culture                                                                               | mC2 myoblasts         | CD (1 $\mu$ g/mL)   | ↓        |
|               | [80]             | Cytoskeleton/stretch-activated ion channel interaction regulates myogenic differentiation of skeletal myoblasts                                                   | mC2C12 myoblasts      | DHCB (1 $\mu$ g/mL) | ↓        |
|               | [81]             | A novel in vitro model for the assessment of postnatal myonuclear accretion                                                                                       | mC2C12 myoblasts      | CD (0.3 $\mu$ M)    | ↓        |
|               | [82]             | Heterochromatin protein (HP)1 $\gamma$ is not only in the nucleus but also in the cytoplasm interacting with actin in both cell compartments                      | mC2C12 myoblasts      | CD (1 $\mu$ g/mL)   | ↓        |
| Tenogenesis   | [84]             | RhoA/ROCK, cytoskeletal dynamics, and focal adhesion kinase are required for mechanical stretch-induced tenogenic differentiation of human mesenchymal stem cells | hBM-MSCs              | CD (1 $\mu$ g/mL)   | ↓        |

h, human; m, mouse; DPSCs, dental pulp-derived stem cells; C2, C2 mouse myoblasts; C2C12, subclone of C2 mouse myoblasts; bone marrow mesenchymal stem cells, BM-MSCs; RhoA/Rho-associated protein kinase, RhoA/ROCK; cytochalasin D, CD; dihydrocytochalasin B, DHCB; \*arrows in the results column indicate the effect of cytochalasins on mesodermic differentiation: ↓ (reduce).

**Table S2.** Cytochalasins and neurogenesis.

| Reference Number | Title                                                                                                                             | Species and Cell Type                | Molecular Treatment | Results*                            |
|------------------|-----------------------------------------------------------------------------------------------------------------------------------|--------------------------------------|---------------------|-------------------------------------|
| [85]             | RhoA/ROCK and Cdc42 regulate cell-cell contact and N-cadherin protein level during neurodetermination of P19 embryonal stem cells | P19 mESCs                            | CB (5 $\mu$ M)      | -                                   |
| [86]             | Surface topography during neural stem cell differentiation regulates cell migration and cell morphology                           | h/mNSCs                              | CD (0.1 $\mu$ M)    | (related to the surface topography) |
| [87]             | Impact of actin filament stabilization on adult hippocampal and olfactory bulb neurogenesis                                       | mouse synaptosomes                   | CD (1 $\mu$ M)      | ↓                                   |
| [88]             | Early-stage development of human induced pluripotent stem cell-derived neurons                                                    | rat neurons<br>hiPSC-derived neurons | CD (1 $\mu$ M)      | -                                   |
| [89]             | High glucose condition suppresses neurosphere formation by human periodontal ligament-derived mesenchymal stem cells              | hPDLSCs                              | CB (10 $\mu$ M)     | ↓                                   |

h, human; m, mouse; ESCs, embryonic stem cells; PDLSCs, periodontal ligament-derived mesenchymal stem cells; iPSC, induced pluripotent stem cell; CB, NSCs, neural stem cells; cytochalasin B; CD, cytochalasin D; \*arrows in the results column indicate the effect of cytochalasins on neurogenesis: - (no effect) ↓ (reduce).
